## PUBLISHER'S NOTE

# Expression of Concern: Downregulated brain and muscle aryl hydrocarbon receptor nuclear translocator-like protein-1 inhibits osteogenesis of BMSCs through p53 in type 2 diabetes mellitus

**Xiaofei Mao, Xiaoguang Li, Wei Hu, Siwei Hao, Yifang Yuan, Lian Guan and Bin Guo**

The Editor-in-Chief of Biology Open has raised queries concerning the data shown in *Biology Open* (2020) **9**, bio051482 (doi:10.1242/bio.051482).

The authors have been contacted for an explanation and have been asked to supply the original data.

Biology Open is publishing this note to make readers aware of the problem; we will provide further information once it has been resolved. This course of action follows the advice set out by COPE (Committee on Publication Ethics), of which Biology Open is a member.
